# Supplementary material for: Uniform yolk-shell iron sulfide–carbon nanospheres for superior sodium–iron sulfide batteries
Source: PubMed Central journal article supplement (PMC4846313; doi:10.1038/ncomms9689), 2015-10-28
Supplement: ncomms9689-s1.pdf [file ncomms9689-s1.pdf]

## Supplementary Figures

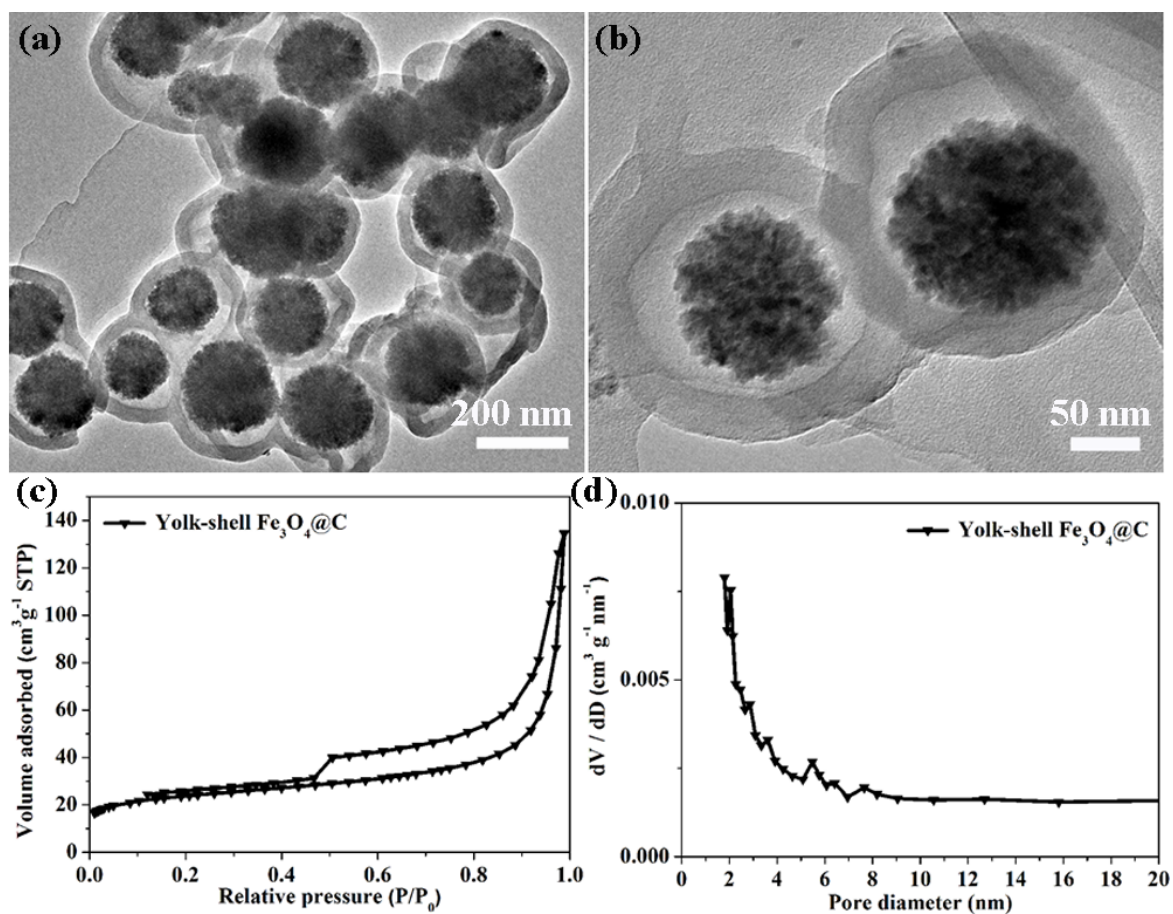

**Supplementary Figure 1.** TEM images (a) and (b) with different magnification of the yolk-shell structured Fe<sub>3</sub>O<sub>4</sub>@C nanospheres by etching away the condense SiO<sub>2</sub> middle layer from the core-shell Fe<sub>3</sub>O<sub>4</sub>@SiO<sub>2</sub>@C nanocomposites. (c) N<sub>2</sub> sorption isotherms and (d) pore size distribution curve of the yolk-shell Fe<sub>3</sub>O<sub>4</sub>@C nanospheres. The Brunauer-Emmett-Teller (BET) surface area, total pore volume, and pore size distribution of the yolk-shell Fe<sub>3</sub>O<sub>4</sub>@C nanospheres are calculated to be as high as 138 m<sup>2</sup>g<sup>-1</sup>, 0.21 cm<sup>3</sup>g<sup>-1</sup>, and 2 nm, respectively.

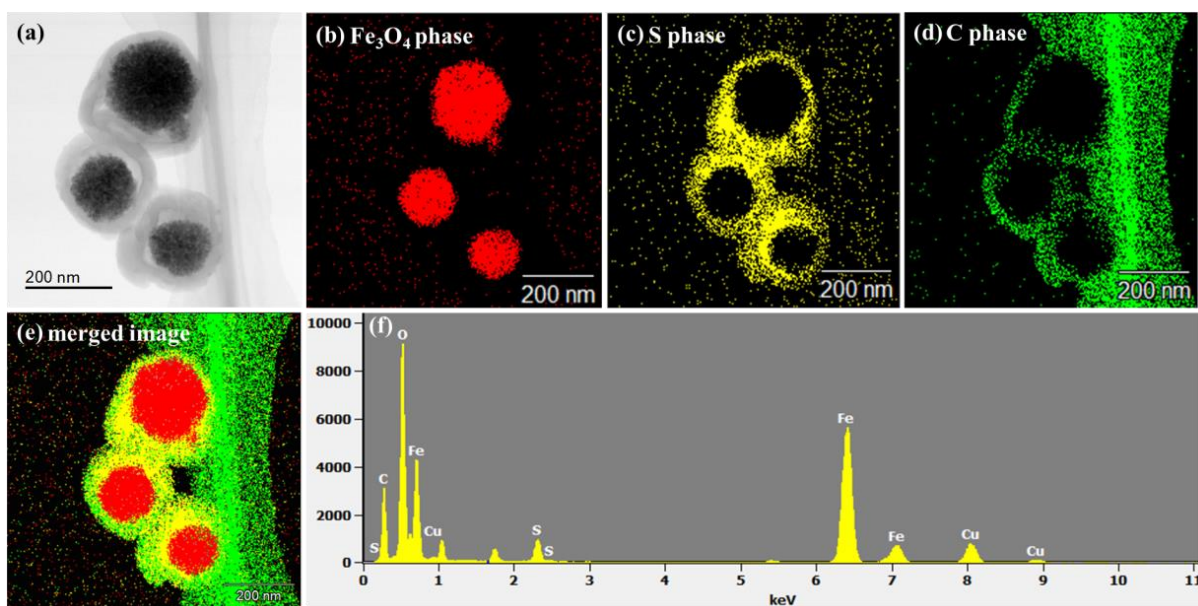

**Supplementary Figure 2.** (a) TEM image, the corresponding phases mapping of (b) Fe<sub>3</sub>O<sub>4</sub>, (c) S, (d) C, and the merged image, and the corresponding EDS spectrum for the core-shell Fe<sub>3</sub>O<sub>4</sub>-S@C nanocomposites after loading sulfur into yolk-shell Fe<sub>3</sub>O<sub>4</sub>@C *via* melt-diffusion strategy. The phase mapping images demonstrate that the sulfur is well-loaded in the void of yolk-shell Fe<sub>3</sub>O<sub>4</sub>@C nanospheres.

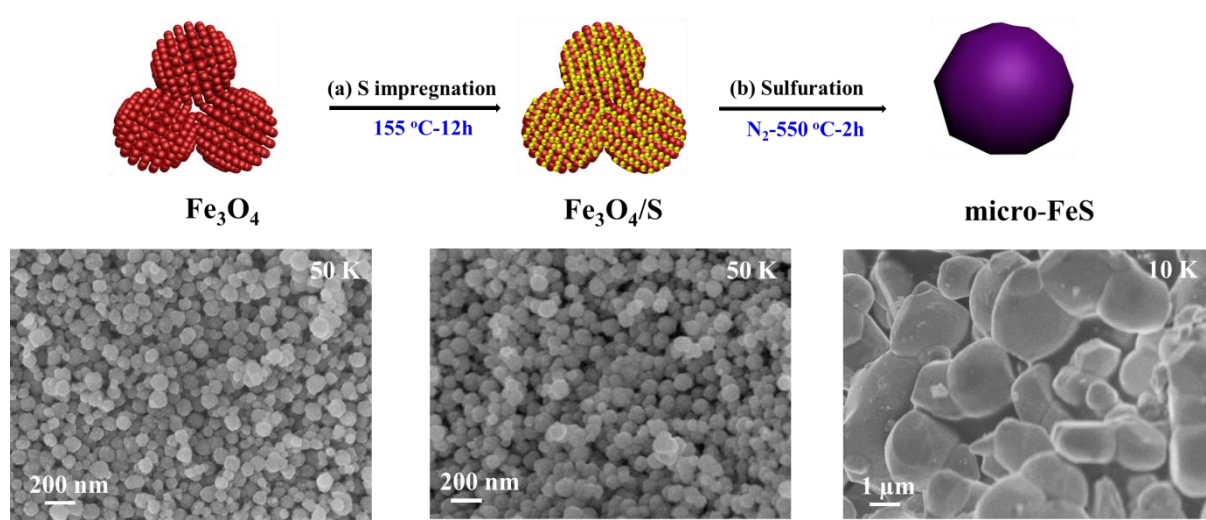

**Supplementary Figure 3.** Schematic illustration for the preparation process of the micro-sized FeS particles (micro-FeS) and the corresponding SEM images of the  $\text{Fe}_3\text{O}_4$  nanoparticles, the  $\text{Fe}_3\text{O}_4/\text{S}$  mixture, and micro-FeS.

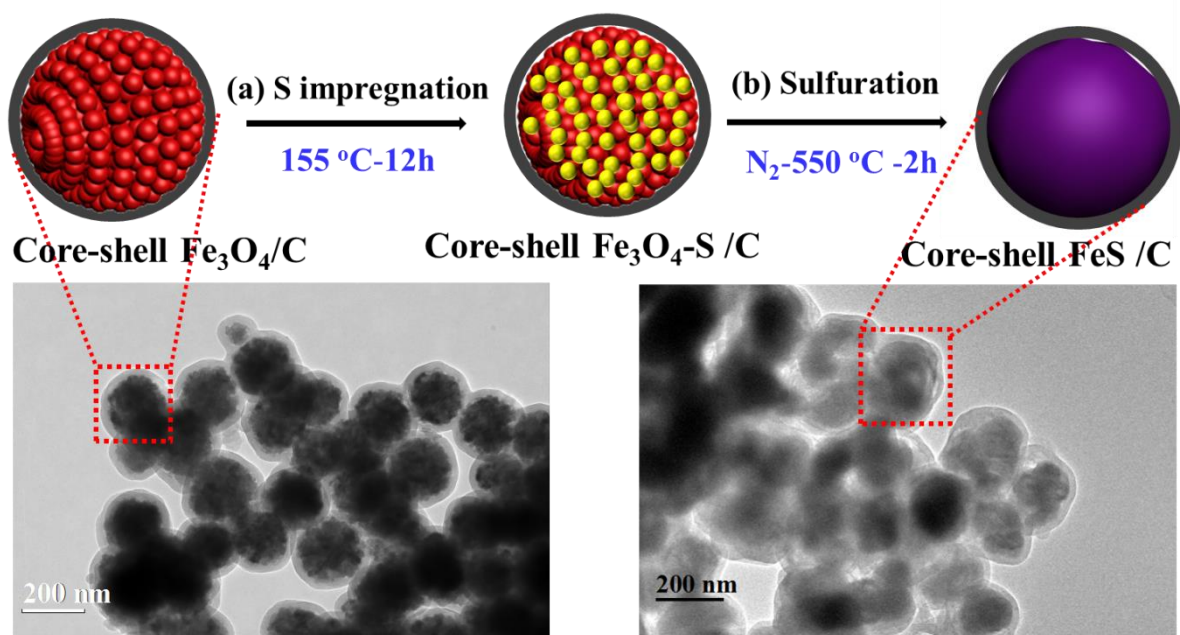

**Supplementary Figure 4.** Schematic illustration for the preparation process of the core-shell FeS/C nanoparticles (FeS/C) and the corresponding TEM images of the core-shell  $\text{Fe}_3\text{O}_4/\text{C}$  and FeS/C nanoparticles.

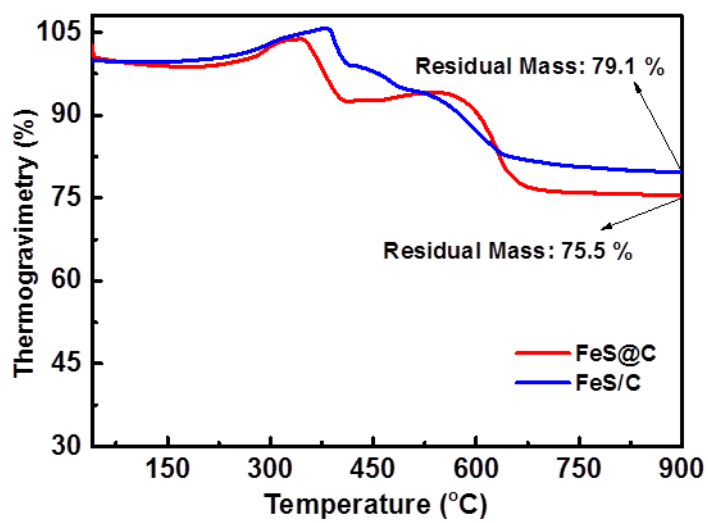

**Supplementary Figure 5.** TGA results of yolk-shell FeS@C and core-shell FeS/C nanocomposites.

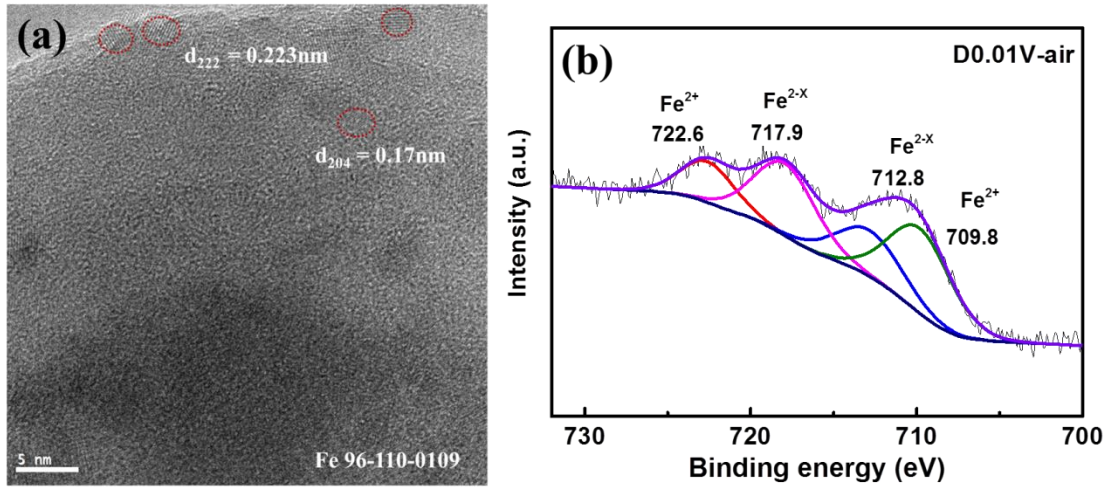

**Supplementary Figure 6.** The corresponding TEM image of micro-FeS electrodes at discharged to 0.01 V (D0.01 V) and the ex-situ XPS spectra of Fe 2p for the D0.01 V electrode exposed to air overnight (D0.01 V-air).

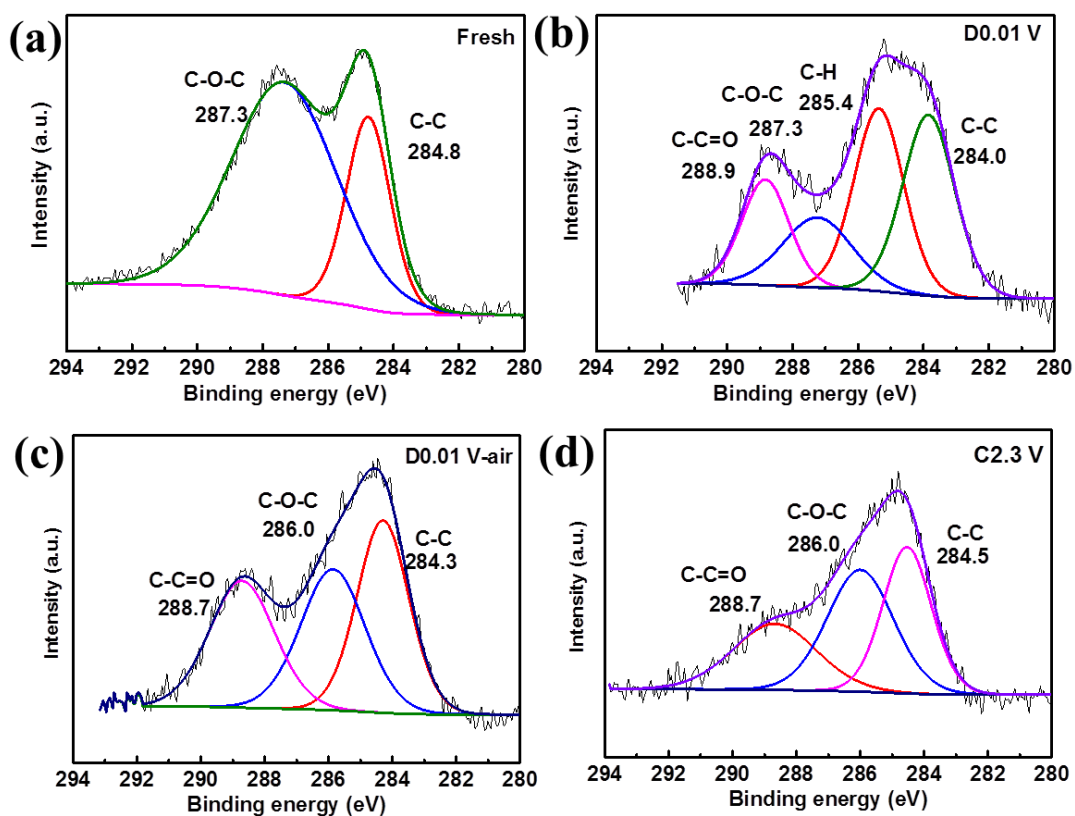

**Supplementary Figure 7.** The respective *ex-situ* XPS spectra of C1s from the micro-FeS electrodes at (a) fresh state, (b) discharged to 0.01 V (D0.01 V), (c) the D0.01 V electrode exposed to air overnight (D0.01 V-air), and (d) charged back to 2.3V (C2.3 V).

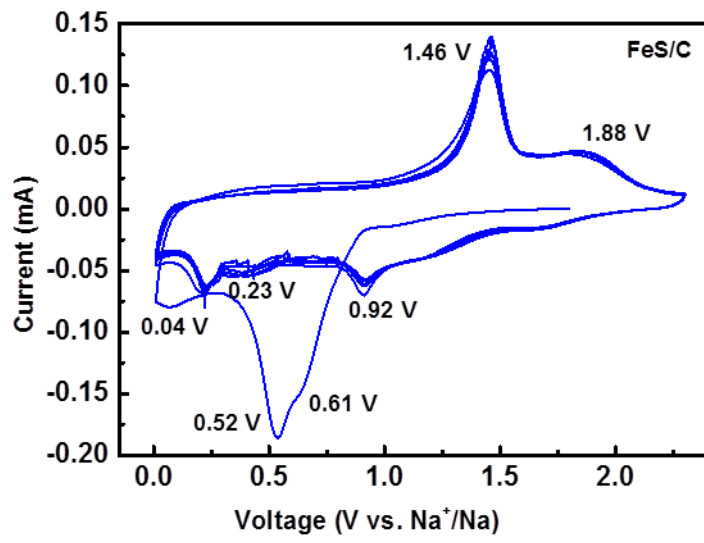

**Supplementary Figure 8.** Cyclic voltammograms of the core-shell FeS/C nanospheres.



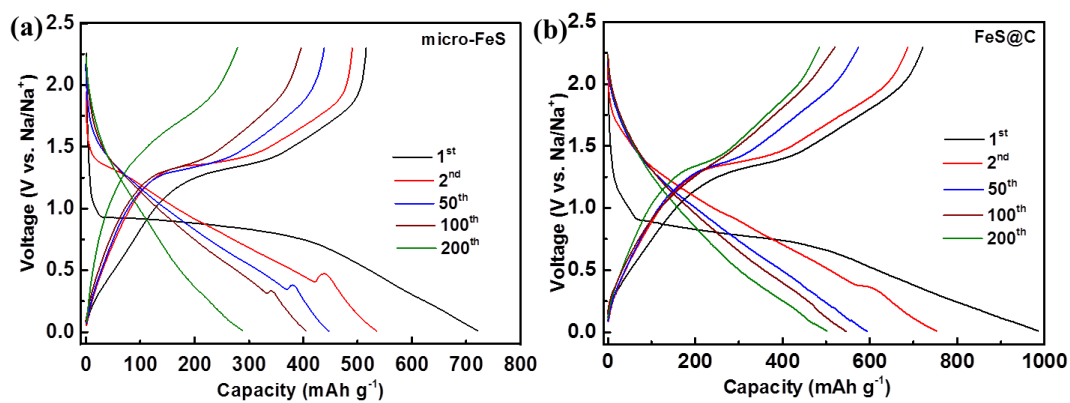

**Supplementary Figure 9.** Charge/discharge curves of (a) the micro-FeS and (b) yolk-shell FeS@C for the selected cycles at 100 mAh g<sup>-1</sup>.

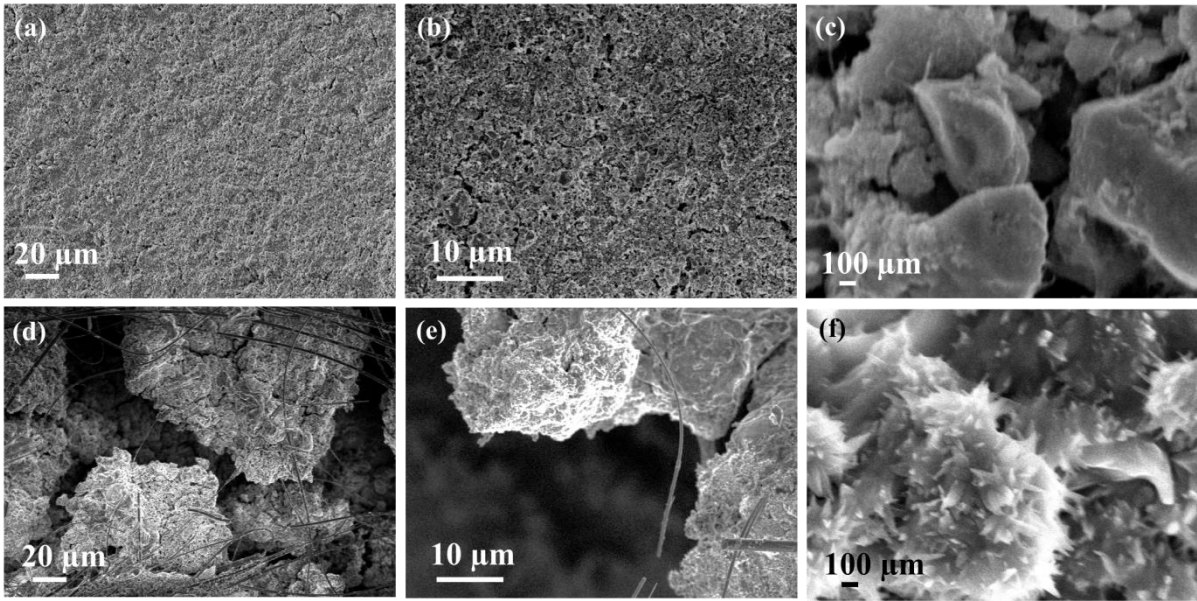

**Supplementary Figure 10.** SEM images of the micro-FeS-based electrodes (a, b, and c) before and (d, e, and f) after 150 cycles at different magnifications.

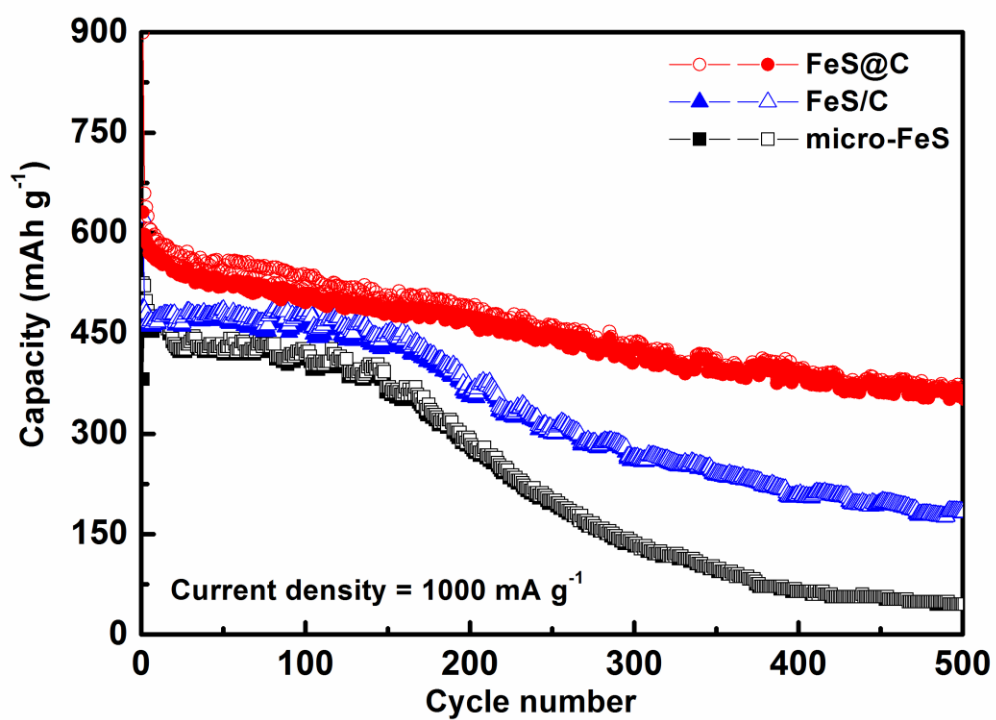

**Supplementary Figure 11.** High-rate cycling performance of the micro-FeS, core-shell FeS/C nanospheres, and yolk-shell FeS@C nanospheres over 500 cycles at the current rate of 2 C (1000 mA g<sup>-1</sup>).

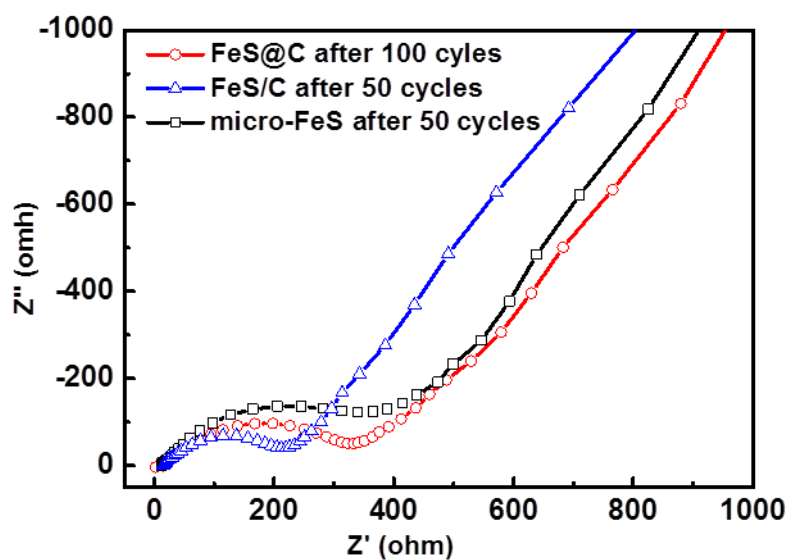

**Supplementary Figure 12.** The impedance plots of the micro-FeS particles, the core-shell FeS/C nanospheres, and the yolk-shell FeS@C nanospheres after rate capability testing at various current densities.

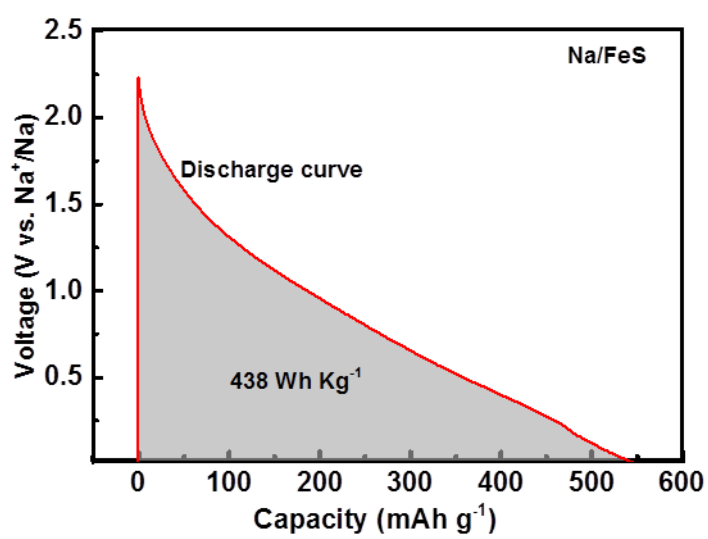

**Supplementary Figure 13.** The calculation of energy density for Na/FeS@C after 100 cycles.

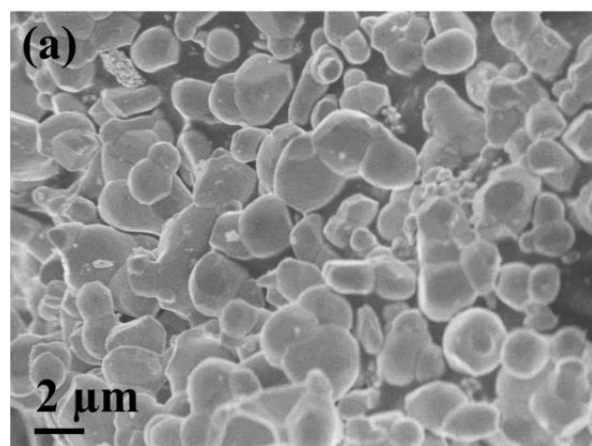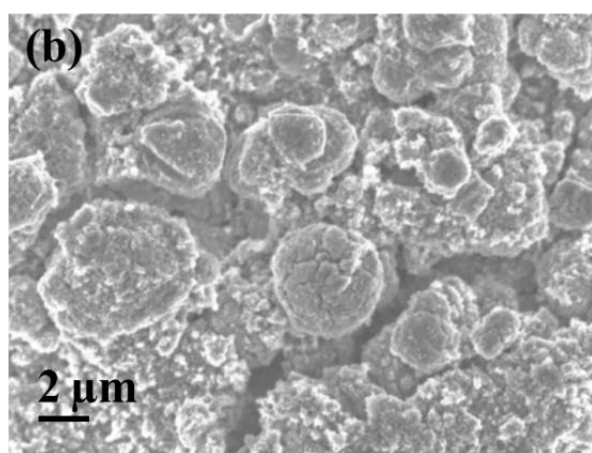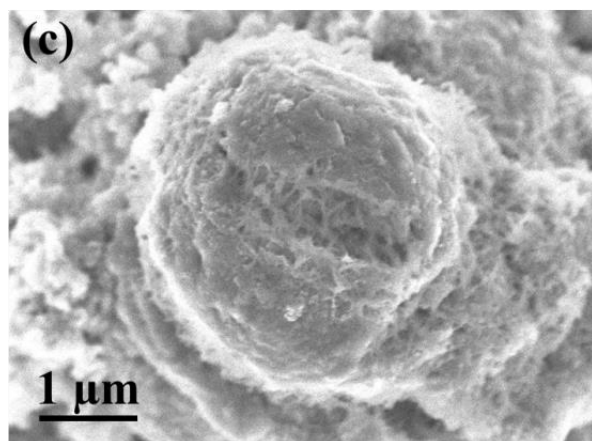

**Supplementary Figure 14.** SEM images of the micro-FeS-based electrodes (a) before and (b), (c) after 50 cycles at different magnifications.

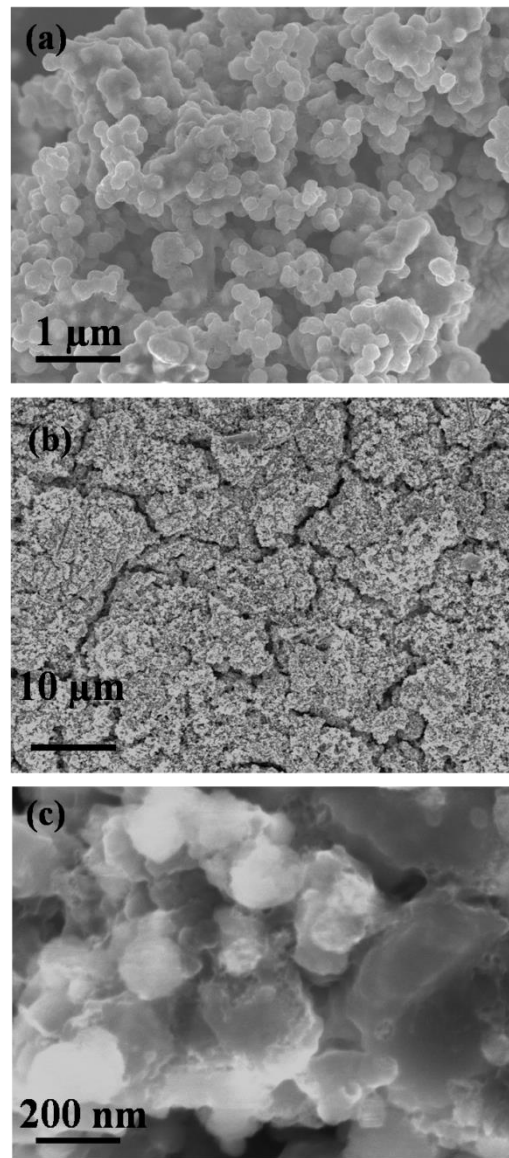

**Supplementary Figure 15.** SEM images of the core-shell FeS/C-based electrodes (a) before and (b), (c) after 50 cycles at different magnifications.

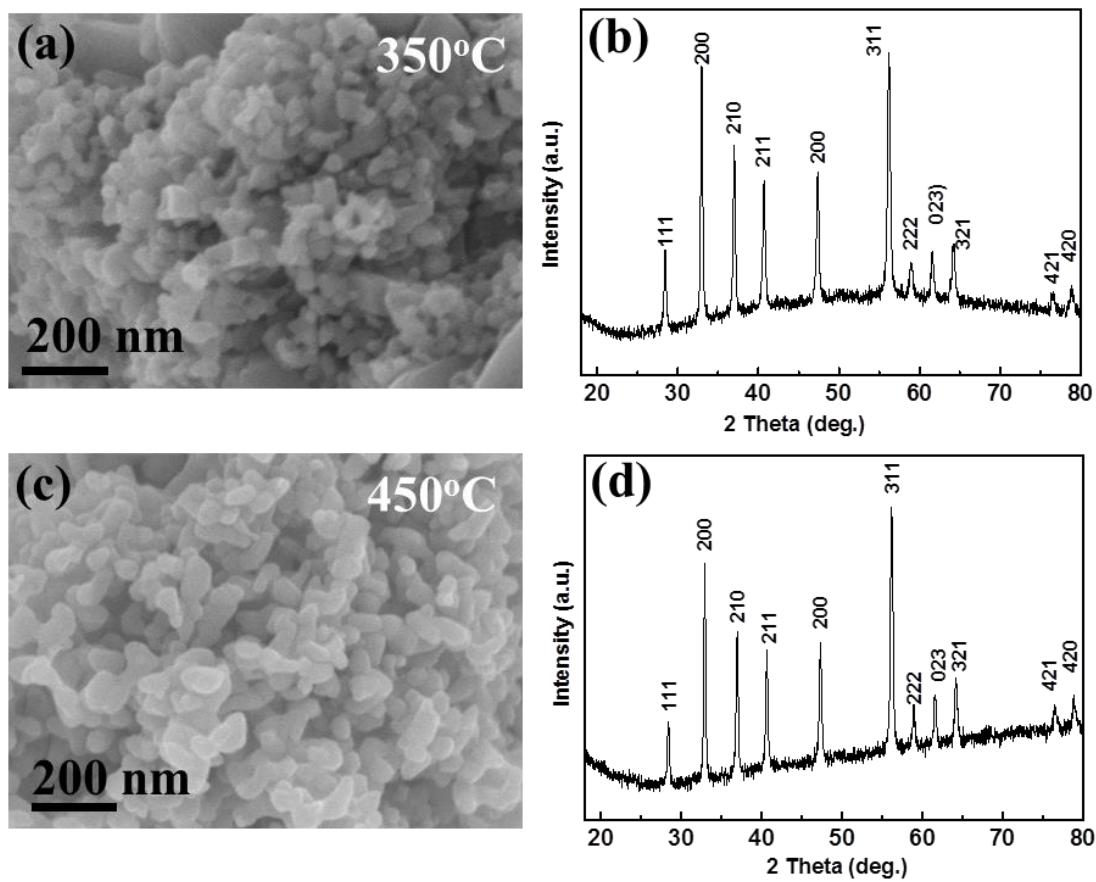

**Supplementary Figure 16.** SEM images (a) and (c); XRD patterns (b) and (d) of FeS<sub>2</sub> nanoparticles prepared by sulfuration reaction of the Fe<sub>3</sub>O<sub>4</sub>/S mixture at 350 and 450°C, respectively.
